# Supplementary material
Source: ML conference proceedings conference paper supplement (https://proceedings.mlr.press/v37/cohena15.html)
Supplement: Supplementary file 1 [file cohena15-supp.pdf]

---

# Supplementary material: Following the Perturbed Leader for Online Structured Learning

---

## 7. Appendix

### 7.1. Additional proofs

#### 7.1.1. MAXIMA OF NORMAL RANDOM VARIABLES

**Lemma 9.** *Suppose the conditions of Theorem 1 hold, then*

$$\mathbb{E} \left[ \max_{x \in \mathcal{X}} \langle x, \gamma \rangle \right] \leq \sqrt{2k \log |\mathcal{X}|}$$

*Proof.* First, we upper bound the expectation by

$$\mathbb{E}_\gamma \left[ \max_{x \in \mathcal{X}} \langle x, \gamma \rangle \right] \leq \inf_{s > 0} \frac{1}{s} \log \left( \sum_{x \in \mathcal{X}} \mathbb{E}[\exp(s \langle x, \gamma \rangle)] \right)$$

Notice that  $\langle x, \gamma \rangle$  is a normal random variable with mean 0 and variance  $\|x\|^2 \leq k$ . As such,

$$\mathbb{E}[\exp(s \langle x, \gamma \rangle)] = \exp \left( \frac{s^2 \|x\|^2}{2} \right) \leq \exp \left( \frac{ks^2}{2} \right)$$

Then,

$$\begin{aligned} \mathbb{E}_\gamma \left[ \max_{x \in \mathcal{X}} \langle x, \gamma \rangle \right] &\leq \inf_{s > 0} \frac{1}{s} \log \left( |\mathcal{X}| \exp \left( \frac{ks^2}{2} \right) \right) \\ &= \inf_{s > 0} \left\{ \frac{\log |\mathcal{X}|}{s} + \frac{ks}{2} \right\} \\ &= \sqrt{2k \log |\mathcal{X}|} \end{aligned}$$

□

#### 7.1.2. BOUNDING THE HESSIAN

**Lemma 10.** *Suppose that the conditions of Theorem 1 hold. Let  $H$  denote the Hessian of  $\Phi_\eta$  at an arbitrary  $\theta$ . Fix some  $j \in [d]$ . Then,*

$$\sum_{i=1}^d |H_{i,j}| \leq \frac{k}{\eta} \sum_{x \in \mathcal{X}} |\mathbb{E}[\gamma_j \mathbb{1}[\hat{x} = x]]|$$

*Proof.* Recall the definition of the Hessian:

$$H_{i,j} = \frac{1}{\eta} \mathbb{E} \left[ \hat{x}(\tilde{\theta}_t + \eta\gamma)_i \gamma_j \right]$$

Let us abbreviate  $\hat{x}(\theta + \eta\gamma)$  as  $\hat{x}$ . Then,

$$\begin{aligned} \eta \sum_{i=1}^d |H_{i,j}| &= \eta \sum_{i: H_{i,j} > 0} H_{i,j} - \eta \sum_{i: H_{i,j} \leq 0} H_{i,j} \\ &= \mathbb{E} \left[ \left( \sum_{i: H_{i,j} > 0} \hat{x}_i - \sum_{i: H_{i,j} \leq 0} \hat{x}_i \right) \gamma_j \right] \\ &= \sum_{x \in \mathcal{X}} \mathbb{E} \left[ \left( \sum_{i: H_{i,j} > 0} \hat{x}_i - \sum_{i: H_{i,j} \leq 0} \hat{x}_i \right) \gamma_j \mathbb{1}[\hat{x} = x] \right] \\ &= \sum_{x \in \mathcal{X}} \left( \sum_{i: H_{i,j} > 0} x_i - \sum_{i: H_{i,j} \leq 0} x_i \right) \mathbb{E}[\gamma_j \mathbb{1}[\hat{x} = x]] \\ &\leq k \sum_{x \in \mathcal{X}} |\mathbb{E}[\gamma_j \mathbb{1}[\hat{x} = x]]| \end{aligned}$$

as  $\left| \sum_{i: H_{i,j} > 0} x_i - \sum_{i: H_{i,j} \leq 0} x_i \right| \leq k$  by assumption.

□

#### 7.1.3. BOUNDING THE HESSIAN FOR THE $k$ -SETS PROBLEM

*Proof of lemma 3.* Let  $H = \nabla^2 \Phi_\eta(\tilde{\theta})$ . We have that,

$$H_{i,j} = \frac{1}{\eta} \mathbb{E} \left[ \hat{x}(\tilde{\theta} + \eta\gamma)_i \gamma_j \right]$$

with  $\hat{x}(z) \in \arg \min_{x \in \mathcal{X}} \langle x, z \rangle$  (Abernethy et al., 2014, Lemma 7). We shall abbreviate  $\hat{x}$  for  $\hat{x}(\tilde{\theta} + \eta\gamma)$  in the remainder of the proof.

First, notice that

$$\sum_{i,j} H_{i,j} = \frac{1}{\eta} \sum_{i,j} \mathbb{E}[\gamma_j \hat{x}_i] = \frac{k}{\eta} \sum_{j=1}^d \mathbb{E}[\gamma_j] = 0$$

Secondly, we argue about the sign of  $\mathbb{E}[\gamma_j \hat{x}_i]$ . We claim that it is negative if  $i = j$  and positive otherwise. To see that, notice that  $\gamma_j$  is a symmetric random variable, so that for each  $\alpha > 0$  the density of  $\gamma_j$  at  $\alpha$  and at  $-\alpha$  is the same. If  $i \neq j$ , the event  $\hat{x}_i = 1$  is more probable if  $\gamma_j = \alpha$  than when  $\gamma_j = -\alpha$ . If  $i = j$  then the opposite is true.

055  
056  
057  
058  
059  
060  
061  
062  
063  
064  
065  
066  
067  
068  
069  
070  
071  
072  
073  
074  
075  
076  
077  
078  
079  
080  
081  
082  
083  
084  
085  
086  
087  
088  
089  
090  
091  
092  
093  
094  
095  
096  
097  
098  
099  
100  
101  
102  
103  
104  
105  
106  
107  
108  
109

We have,

$$\begin{aligned} \sum_{i,j} H_{i,j} &= \sum_{i,j:H_{i,j} \geq 0} H_{i,j} - \sum_{i,j:H_{i,j} < 0} H_{i,j} \\ &= -2 \sum_{i,j:H_{i,j} < 0} H_{i,j} \\ &= -2 \operatorname{Tr}(H) \end{aligned}$$

The rest of the proof follows that of lemma 2.

#### 7.1.4. TECHNICAL LEMMA

**Lemma 11.** *We have,*

$$\begin{aligned} \max \left\{ \min \left\{ \frac{Td}{16}, \frac{d\eta\sqrt{2}}{32} \right\}, \frac{Td}{16} \operatorname{erf} \left( -\frac{\sqrt{d}}{4\eta} \right) \right\} \\ \geq \min \left\{ 0.02Td, 0.05d^{5/4}\sqrt{T} \right\} \end{aligned}$$

*Proof.* We get,

$$\begin{aligned} \max \left\{ \min \left\{ \frac{Td}{16}, \frac{d\eta\sqrt{2}}{32} \right\}, \frac{Td}{16} \operatorname{erf} \left( \frac{\sqrt{d}}{4\eta} \right) \right\} \\ \geq \min \left\{ \frac{Td}{16}, \right. \\ \left. \max \left\{ \frac{d\eta\sqrt{2}}{32}, \frac{Td}{16} \operatorname{erf} \left( \frac{\sqrt{d}}{4\eta} \right) \right\} \right\} \end{aligned}$$

Notice that erf is nondecreasing and concave on  $\mathbb{R}_+$ . Then,

$$\begin{aligned} \inf_{\eta > 0} \max \left\{ \frac{d\eta\sqrt{2}}{32}, \frac{Td}{16} \operatorname{erf} \left( \frac{\sqrt{d}}{4\eta} \right) \right\} \\ \geq \min \left\{ \inf_{\eta < \sqrt{d}/4} \frac{Td}{16} \operatorname{erf} \left( \frac{\sqrt{d}}{4\eta} \right), \right. \\ \left. \inf_{\eta \geq \sqrt{d}/4} \max \left\{ \frac{d\eta\sqrt{2}}{32}, \frac{Td}{16} \operatorname{erf} \left( \frac{\sqrt{d}}{4\eta} \right) \right\} \right\} \\ \geq \min \left\{ \frac{Td}{16} \operatorname{erf}(1), \right. \\ \left. \inf_{\eta \geq \sqrt{d}/4} \max \left\{ \frac{d\eta\sqrt{2}}{32}, \frac{Td}{16} \frac{\sqrt{d}}{4\eta} \operatorname{erf}(1) \right\} \right\} \\ \geq \min \left\{ \frac{Td}{16} \operatorname{erf}(1), \sqrt{\frac{d\sqrt{2}Td}{32} \frac{\sqrt{d}}{16} \frac{\sqrt{d}}{4} \operatorname{erf}(1)} \right\} \\ \geq \min \left\{ 0.05Td, 0.02d^{5/4}\sqrt{T} \right\} \end{aligned}$$

as required.  $\square$

## 7.2. Lipschitz property of certain distributions

### 7.2.1. UNIFORM OVER THE CUBE

Remember that we had required the marginals to have a variance of 1. Therefore WLOG we will take the cube to be  $C = [0, 1/\sqrt{3}]^d$ . Then,

$$\begin{aligned} \square \quad \operatorname{TV}(P, Q) &= \sup_A \left| \Pr_P[A] - \Pr_Q[A] \right| \\ &= \sup_A \left| \frac{1}{\operatorname{Vol}(C)} \int_{x \in A} \mathbb{1}_{[x \in C + \{\mu_P\}]} - \mathbb{1}_{[x \in C + \{\mu_Q\}]} \right| \\ &\leq \sup_A \frac{1}{\operatorname{Vol}(C)} \int_{x \in A} \left| \mathbb{1}_{[x \in C + \{\mu_P\}]} - \mathbb{1}_{[x \in C + \{\mu_Q\}]} \right| \\ &\leq \frac{1}{\operatorname{Vol}(C)} \int_{x \in \mathbb{R}^d} \left| \mathbb{1}_{[x \in C + \{\mu_P\}]} - \mathbb{1}_{[x \in C + \{\mu_Q\}]} \right| \\ &= \frac{\operatorname{Vol}((C + \{\mu_P\}) \Delta (C + \{\mu_Q\}))}{\operatorname{Vol}(C)} \\ &\leq \frac{2(1/\sqrt{3})^{d-1} \|\mu_P - \mu_Q\|_1}{(1/\sqrt{3})^d} = 2\sqrt{3} \|\mu_P - \mu_Q\|_1 \end{aligned}$$

so that  $L = 2\sqrt{3}$ .

We now explain the above bound. Suppose that  $C + \{\mu_P\}$  and  $C + \{\mu_Q\}$  do not intersect. Then we must have  $\|\mu_P - \mu_Q\|_\infty > 1/\sqrt{3}$ .

$$\begin{aligned} \operatorname{Vol}((C + \{\mu_P\}) \Delta (C + \{\mu_Q\})) &= 2 \left( \frac{1}{\sqrt{3}} \right)^d \\ &< 2 \left( \frac{1}{\sqrt{3}} \right)^{d-1} \|\mu_P - \mu_Q\|_\infty \\ &\leq 2 \left( \frac{1}{\sqrt{3}} \right)^{d-1} \|\mu_P - \mu_Q\|_1 \end{aligned}$$

If  $C + \{\mu_P\}$  and  $C + \{\mu_Q\}$  do intersect, then  $\|\mu_P - \mu_Q\|_\infty \leq 1/\sqrt{3}$  and we have

$$\begin{aligned} \operatorname{Vol}((C + \{\mu_P\}) \cap (C + \{\mu_Q\})) \\ = \prod_{i=1}^d \left( \frac{1}{\sqrt{3}} - |\mu_{P,i} - \mu_{Q,i}| \right) \end{aligned}$$

$\square$

165  
166  
167  
168  
169  
170  
171  
172  
173  
174  
175  
176  
177  
178  
179  
180  
181  
182  
183  
184  
185  
186  
187  
188  
189  
190  
191  
192  
193  
194  
195  
196  
197  
198  
199  
200  
201  
202  
203  
204  
205  
206  
207  
208  
209  
210  
211  
212  
213  
214  
215  
216  
217  
218  
219

so that

$$\begin{aligned}
 & \text{Vol}((C + \{\mu_P\}) \triangle (C + \{\mu_Q\})) \\
 &= \text{Vol}(C + \{\mu_P\}) + \text{Vol}(C + \{\mu_Q\}) \\
 &\quad - 2\text{Vol}((C + \{\mu_P\}) \cap (C + \{\mu_Q\})) \\
 &= 2 \left( \left( \frac{1}{\sqrt{3}} \right)^d - \prod_{i=1}^d \left( \frac{1}{\sqrt{3}} - |\mu_{P,i} - \mu_{Q,i}| \right) \right) \\
 &= 2 \left( \frac{1}{\sqrt{3}} \right)^d \left( 1 - \prod_{i=1}^d \left( 1 - \sqrt{3} |\mu_{P,i} - \mu_{Q,i}| \right) \right) \\
 &\leq 2 \left( \frac{1}{\sqrt{3}} \right)^d \sqrt{3} \|\mu_P - \mu_Q\|_1 \\
 &= 2 \left( \frac{1}{\sqrt{3}} \right)^{d-1} \|\mu_P - \mu_Q\|_1
 \end{aligned}$$

### 7.2.2. LAPLACE AND NEGATIVE EXPONENTIAL

We will show that for the Laplace distribution we have  $L = \sqrt{2}$ . For the exponential distribution the proof is similar except with  $L = 1$ . Once again, recall that we had required the marginals to have a variance of 1, and therefore the PDF of the Laplace distribution is  $\exp(-\sqrt{2}|x - \mu|)/\sqrt{2}$ . In this case,

We want to bound

$$\begin{aligned}
 \text{TV}(P, Q) &= \sup_A \left| \Pr_P[A] - \Pr_Q[A] \right| \\
 &= \sup_A \left| \int_A \frac{1}{\sqrt{2}} \exp(-\sqrt{2}\|x - \mu_P\|_1) \right. \\
 &\quad \left. - \frac{1}{\sqrt{2}} \exp(-\sqrt{2}\|x - \mu_Q\|_1) \right|
 \end{aligned}$$

We have,

$$\begin{aligned}
 & \int_A \frac{1}{\sqrt{2}} \exp(-\sqrt{2}\|x - \mu_P\|_1) \\
 &\quad - \frac{1}{\sqrt{2}} \exp(-\sqrt{2}\|x - \mu_Q\|_1) \\
 &= \int_A \frac{1}{\sqrt{2}} \exp(-\sqrt{2}\|x - \mu_P\|_1) \\
 &\quad \cdot \left( 1 - \exp(\sqrt{2}\|x - \mu_P\|_1 - \sqrt{2}\|x - \mu_Q\|_1) \right) \\
 &\leq \int_A \frac{1}{\sqrt{2}} \exp(-\sqrt{2}\|x - \mu_P\|_1) \\
 &\quad \cdot \left( \sqrt{2}\|x - \mu_Q\|_1 - \sqrt{2}\|x - \mu_P\|_1 \right) \\
 &\leq \int_A \frac{1}{\sqrt{2}} \exp(-\sqrt{2}\|x - \mu_P\|_1) \left( \sqrt{2}\|\mu_P - \mu_Q\|_1 \right) \\
 &\leq \sqrt{2} \|\mu_P - \mu_Q\|_1
 \end{aligned}$$

Similarly, one can bound

$$\begin{aligned}
 & \int_A \frac{1}{\sqrt{2}} \exp(-\sqrt{2}\|x - \mu_Q\|_1) \\
 &\quad - \frac{1}{\sqrt{2}} \exp(-\sqrt{2}\|x - \mu_P\|_1) \leq \sqrt{2} \|\mu_P - \mu_Q\|_1
 \end{aligned}$$

and thus

$$\text{TV}(P, Q) \leq \sqrt{2} \|\mu_P - \mu_Q\|_1$$

as claimed.

## References

Abernethy, Jacob, Lee, Chansoo, Sinha, Abhinav, and Tewari, Ambuj. Online linear optimization via smoothing. *The Journal of Machine Learning Research*, 35: 807–823, 2014.

275  
276  
277  
278  
279  
280  
281  
282  
283  
284  
285  
286  
287  
288  
289  
290  
291  
292  
293  
294  
295  
296  
297  
298  
299  
300  
301  
302  
303  
304  
305  
306  
307  
308  
309  
310  
311  
312  
313  
314  
315  
316  
317  
318  
319  
320  
321  
322  
323  
324  
325  
326  
327  
328  
329
